# Supplementary material for: Highly uniform Ni(HCO3)2 spheres: the morphology evolution and electrochemical performance
Source: Royal Society of Chemistry journal article supplement (doi:10.1039/d1dt01063h), 2021-01-01
Supplement: d1dt01063h1.pdf [file d1dt01063h1.pdf]

**Supporting Information**

Highly uniform Ni(HCO<sub>3</sub>)<sub>2</sub> spheres: the morphology evolution and electrochemical performance

Cuixia Cheng\*, Fang Chen, Huiyang Yi, Yinfang Cheng, Guosong Lai

Hubei Key Laboratory of Pollutant Analysis & Reuse Technology, College of Chemistry and

Chemical Engineering, Hubei Normal University, Huangshi 435002, Hubei, P. R. China

---

\* Corresponding author Tel/Fax: +86 7146515602  
E-mail address: Chengcx@hbnu.edu.cn

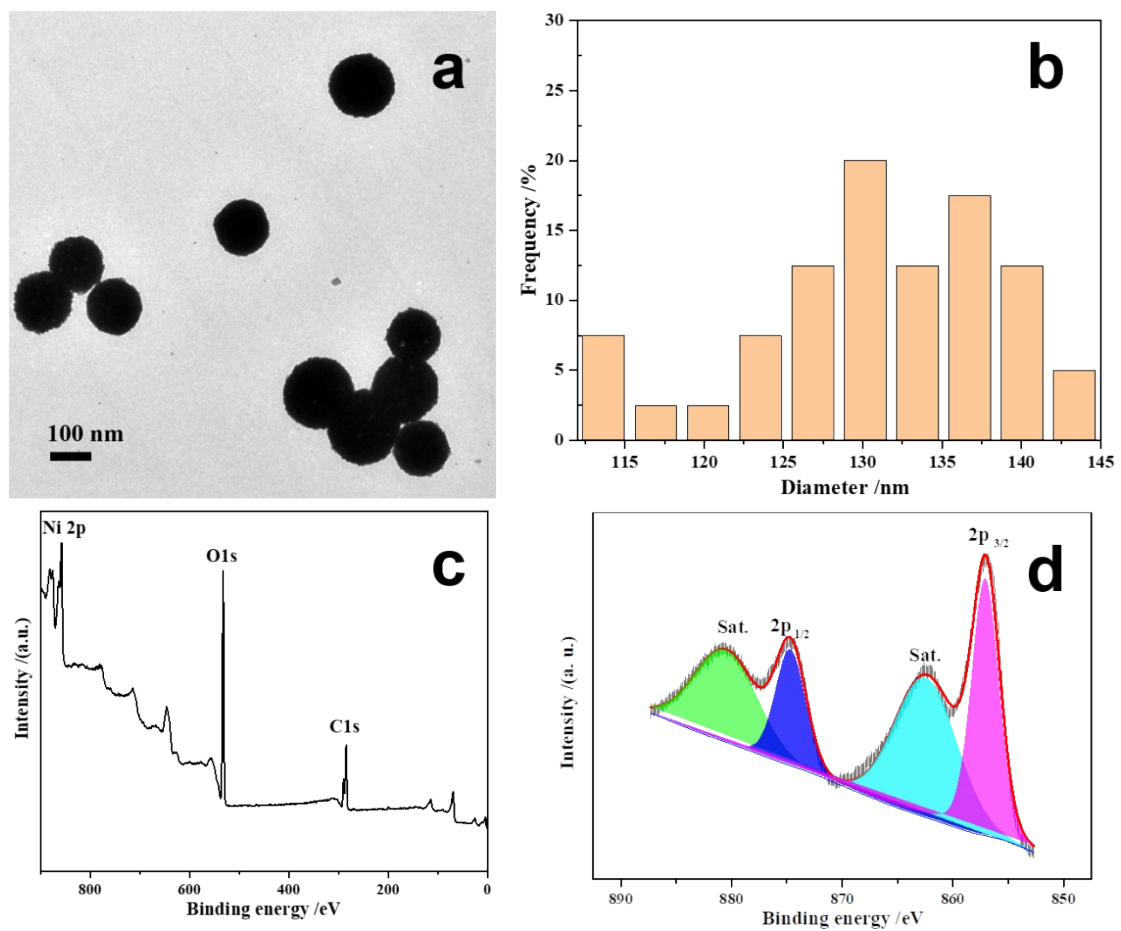

Fig. S1: NHC-15: (a) TEM, (b) the particle size distribution, XPS (c) Survey and (d) Ni 2p

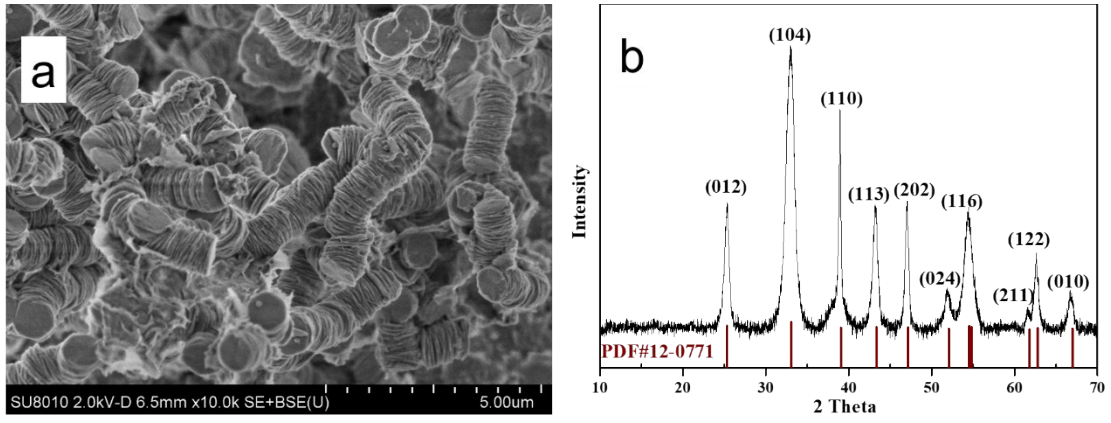

Fig. S2 the sample reacted for 15h at 150 °C: (a) SEM and (b) XRD

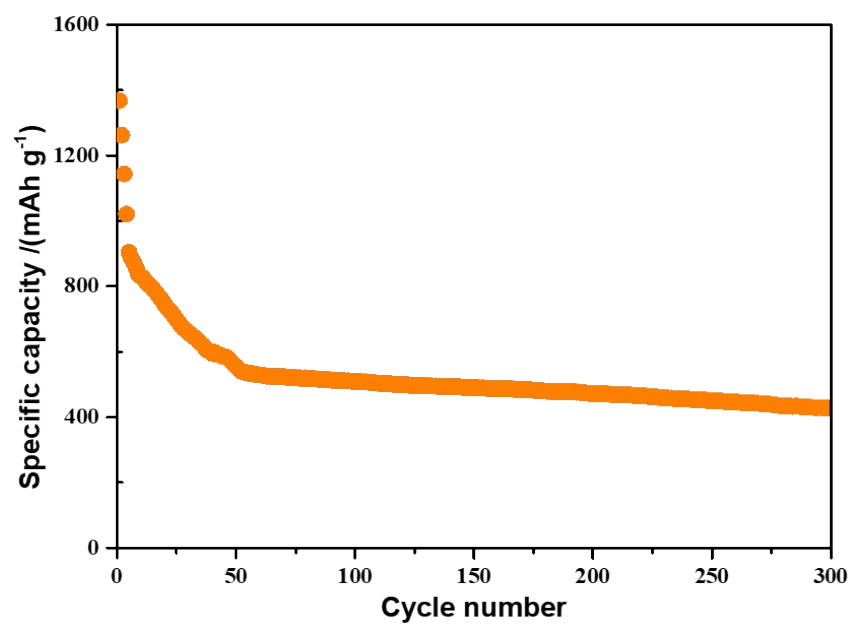

Fig. S3 Capacity vs. cycle number of NHC-22 at 0.2 mA g<sup>-1</sup>.

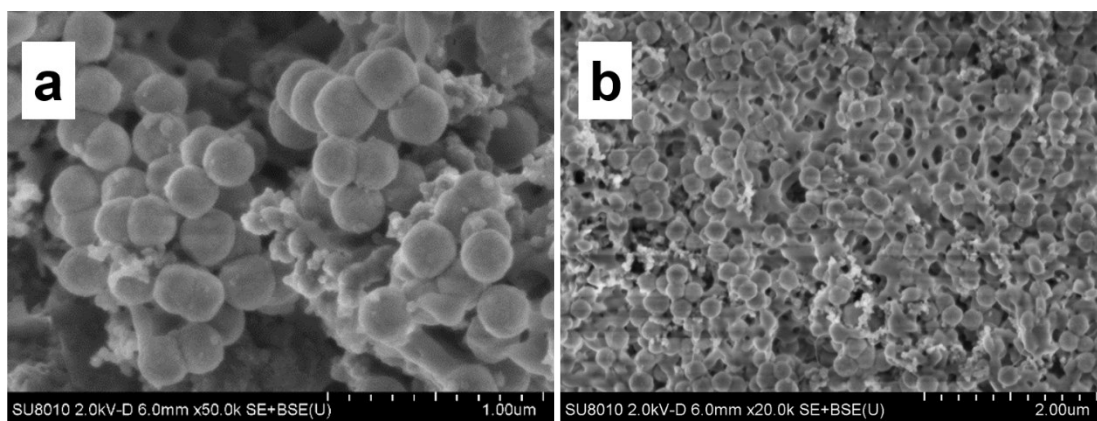

Fig. S4 Ex situ SEM images of NHC-15 electrode: a) fresh and b) after 300 cycles at  $0.2 \text{ mA g}^{-1}$ .
